# Supplementary material for: Multivariate analysis reveals environmental and genetic determinants of element covariation in the maize grain ionome
Source: PubMed Central journal article supplement (PMC6589523; doi:10.1002/pld3.139), 2019-05-10
Supplement: PLD3-3-e00139-s005.pdf [file PLD3-3-e00139-s005.pdf]

|      | Overall<br>_Total | FL05 | FL06 | IN09 | IN10 | MO06 | NC06 | NY05 | NY06 | NY12 | SA10 |
|------|-------------------|------|------|------|------|------|------|------|------|------|------|
| PC1  | 5                 | 2    | 0    | 0    | 0    | 1    | 1    | 1    | 0    | 0    | 0    |
| PC2  | 6                 | 0    | 0    | 1    | 0    | 0    | 1    | 4    | 0    | 0    | 0    |
| PC3  | 10                | 1    | 0    | 0    | 1    | 0    | 0    | 5    | 1    | 2    | 0    |
| PC4  | 10                | 2    | 0    | 1    | 0    | 0    | 1    | 5    | 0    | 1    | 0    |
| PC5  | 22                | 1    | 1    | 0    | 1    | 0    | 1    | 6    | 9    | 1    | 2    |
| PC6  | 9                 | 0    | 0    | 1    | 1    | 0    | 2    | 3    | 1    | 1    | 0    |
| PC7  | 7                 | 0    | 0    | 2    | 1    | 0    | 1    | 0    | 0    | 3    | 0    |
| PC8  | 3                 | 0    | 0    | 1    | 1    | 0    | 1    | 0    | 0    | 0    | 0    |
| PC9  | 6                 | 0    | 0    | 1    | 0    | 0    | 1    | 1    | 0    | 1    | 2    |
| PC10 | 4                 | 0    | 0    | 1    | 0    | 0    | 1    | 2    | 0    | 0    | 0    |
| PC11 | 2                 | 0    | 0    | 0    | 0    | 0    | 0    | 2    | 0    | 0    | 0    |
| PC12 | 6                 | 0    | 0    | 2    | 1    | 0    | 3    | 0    | 0    | 0    | 0    |
| PC13 | 2                 | 0    | 0    | 1    | 0    | 0    | 0    | 1    | 0    | 0    | 0    |
| PC14 | 2                 | 0    | 0    | 0    | 1    | 0    | 0    | 0    | 0    | 0    | 1    |
| PC15 | 4                 | 0    | 0    | 0    | 0    | 0    | 1    | 2    | 0    | 0    | 1    |
| PC16 | 2                 | 1    | 0    | 0    | 0    | 0    | 0    | 1    | 0    | 0    | 0    |

**Table S1: Within Environment PCs QTL Counts.** PC traits calculated separately within environments are listed with QTL number counts overall and within environments.
