# Supplementary material for: Multivariate analysis reveals environmental and genetic determinants of element covariation in the maize grain ionome
Source: PubMed Central journal article supplement (PMC6589523; doi:10.1002/pld3.139), 2019-05-10
Supplement: PLD3-3-e00139-s006.pdf [file PLD3-3-e00139-s006.pdf]

**Table S2. PC Loadings and Element QTL Overlap**

Each PC QTL is shown with the QTL location, environment, LOD score, 95th percentile LOD threshold from 1000 random permutations, percent variance of the QTL, effect magnitude and effect direction. Elements with the top 5 loadings into the PC trait are listed. Unique PC QTL are highlighted (QTL with no overlap within 25 cM). For PC QTL that have element QTL within 10 cM, the element traits for these QTL are listed.

| Trait       | Chr      | Pos          | Envirs      | LOD         | LOD Threshold | %Var         | Effect Magnitude | Effect Direction | Elements with top 5 PC loadings (increasing order) | Elemental QTL within 25 cM? | Elements with QTL within 10 cM |
|-------------|----------|--------------|-------------|-------------|---------------|--------------|------------------|------------------|----------------------------------------------------|-----------------------------|--------------------------------|
| PC1         | 4        | 173.9        | FL05        | 5.11        | 3.69          | 13.37        | 9.68             | Mo17             | Mn, Fe, S, Mg                                      | YES                         | Mn, K                          |
| <b>PC1</b>  | <b>4</b> | <b>287.6</b> | <b>FL05</b> | <b>5.09</b> | <b>3.69</b>   | <b>13.30</b> | <b>9.61</b>      | <b>B73</b>       | <b>Mn, Fe, S, Mg</b>                               | <b>NO</b>                   |                                |
| PC3         | 1        | 404.0        | FL05        | 3.93        | 3.71          | 11.59        | 7.88             | B73              | Mg, Fe, Mn, Fe                                     | YES                         | Mn                             |
| PC4         | 1        | 252.4        | FL05        | 4.33        | 3.73          | 9.22         | 5.50             | B73              | Mg, Zn, Mo, Fe                                     | YES                         |                                |
| PC4         | 1        | 380.6        | FL05        | 11.70       | 3.73          | 28.07        | 24.35            | B73              | Mg, Zn, Mo, Fe                                     | YES                         |                                |
| PC5         | 2        | 215.0        | FL05        | 6.35        | 3.68          | 18.03        | 14.35            | Mo17             | Sr, Cu, S, Cd                                      | YES                         | Cd                             |
| PC5         | 1        | 378.0        | FL06        | 4.24        | 3.68          | 18.77        | 15.09            | Mo17             | Fe, P, Mn, Cd                                      | YES                         | Mo                             |
| PC2         | 2        | 216.9        | IN09        | 5.92        | 3.61          | 18.40        | 14.79            | B73              | Ni, Se, Mo, Sr                                     | YES                         | Cd                             |
| PC4         | 2        | 203.2        | IN09        | 5.08        | 3.63          | 16.01        | 12.38            | B73              | Mg, Cd, Mo, Fe                                     | YES                         |                                |
| PC6         | 1        | 378.0        | IN09        | 7.14        | 3.56          | 21.77        | 18.21            | Mo17             | K, Cu, Mo, P                                       | YES                         | Mo                             |
| <b>PC7</b>  | <b>3</b> | <b>358.5</b> | <b>IN09</b> | <b>3.91</b> | <b>3.63</b>   | <b>11.18</b> | <b>7.55</b>      | <b>B73</b>       | <b>Cd, S, K, Mn</b>                                | <b>NO</b>                   |                                |
| PC7         | 4        | 300.0        | IN09        | 3.72        | 3.63          | 10.60        | 6.97             | B73              | Cd, S, K, Mn                                       | YES                         | Fe, K                          |
| PC8         | 9        | 7.7          | IN09        | 8.87        | 3.62          | 26.28        | 22.66            | B73              | P, K, Cd, Se                                       | YES                         | Ni                             |
| <b>PC9</b>  | <b>9</b> | <b>302.2</b> | <b>IN09</b> | <b>3.78</b> | <b>3.74</b>   | <b>12.17</b> | <b>8.43</b>      | <b>Mo17</b>      | <b>Co, Mo, Rb, Ni</b>                              | <b>NO</b>                   |                                |
| PC10        | 2        | 236.7        | IN09        | 3.78        | 3.56          | 12.18        | 8.62             | B73              | Co, Cu, Cd, Mo                                     | YES                         | Ni                             |
| <b>PC12</b> | <b>1</b> | <b>136.5</b> | <b>IN09</b> | <b>4.08</b> | <b>3.62</b>   | <b>11.63</b> | <b>8.01</b>      | <b>Mo17</b>      | <b>Co, Cu, Zn, Fe</b>                              | <b>NO</b>                   |                                |
| <b>PC12</b> | <b>3</b> | <b>267.9</b> | <b>IN09</b> | <b>4.06</b> | <b>3.62</b>   | <b>11.55</b> | <b>7.94</b>      | <b>B73</b>       | <b>Co, Cu, Zn, Fe</b>                              | <b>NO</b>                   |                                |
| <b>PC13</b> | <b>5</b> | <b>33.0</b>  | <b>IN09</b> | <b>4.75</b> | <b>3.77</b>   | <b>15.06</b> | <b>11.30</b>     | <b>Mo17</b>      | <b>K, Rb, Zn, Se</b>                               | <b>NO</b>                   |                                |
| PC3         | 1        | 378.0        | IN10        | 3.60        | 3.57          | 12.07        | 8.50             | Mo17             | K, Co, Zn, Sr                                      | YES                         | Mo                             |
| PC5         | 2        | 211.7        | IN10        | 5.36        | 3.65          | 17.41        | 13.76            | B73              | Ni, Fe, Mn, Sr                                     | YES                         | Mo, Cd                         |
| PC6         | 2        | 209.5        | IN10        | 4.48        | 3.68          | 14.78        | 11.10            | Mo17             | S, Ni, Mn, Cd                                      | YES                         | Mo, Cd                         |
| PC7         | 4        | 315.8        | IN10        | 4.45        | 3.75          | 14.69        | 10.93            | Mo17             | Zn, Rb, K, Mg                                      | YES                         |                                |
| PC8         | 1        | 377.3        | IN10        | 7.62        | 3.71          | 23.76        | 20.05            | B73              | Sr, Co, S, Ni                                      | YES                         | Mo                             |
| <b>PC12</b> | <b>2</b> | <b>102.2</b> | <b>IN10</b> | <b>4.32</b> | <b>3.65</b>   | <b>14.29</b> | <b>10.64</b>     | <b>Mo17</b>      | <b>Zn, Mn, Cu, Fe</b>                              | <b>NO</b>                   |                                |
| PC1         | 10       | 95.5         | MO06        | 3.79        | 3.70          | 29.48        | 25.78            | Mo17             | S, Rb, Fe, K                                       | YES                         | Rb                             |
| PC1         | 7        | 167.0        | NC06        | 4.62        | 3.65          | 13.14        | 9.49             | B73              | Rb, Mg, Zn, Fe                                     | YES                         | Rb                             |
| PC2         | 1        | 378.0        | NC06        | 4.47        | 3.70          | 12.74        | 9.04             | Mo17             | Ni, Cd, Mo, Cd                                     | YES                         | Mo                             |
| PC4         | 9        | 16.8         | NC06        | 4.36        | 3.58          | 12.45        | 8.87             | Mo17             | Mn, P, Ca, Cd                                      | YES                         | Ni                             |
| <b>PC5</b>  | <b>3</b> | <b>358.7</b> | <b>NC06</b> | <b>4.48</b> | <b>3.50</b>   | <b>12.77</b> | <b>9.27</b>      | <b>B73</b>       | <b>K, Mn, Cu, Rb</b>                               | <b>NO</b>                   |                                |
| <b>PC6</b>  | <b>1</b> | <b>244.9</b> | <b>NC06</b> | <b>4.92</b> | <b>3.62</b>   | <b>12.29</b> | <b>8.66</b>      | <b>B73</b>       | <b>S, Ni, Mn, Fe</b>                               | <b>NO</b>                   |                                |
| PC6         | 2        | 217.9        | NC06        | 4.11        | 3.62          | 10.15        | 6.52             | Mo17             | S, Ni, Mn, Fe                                      | YES                         | Cd                             |
| PC7         | 2        | 215.0        | NC06        | 12.03       | 3.75          | 30.71        | 26.96            | B73              | Fe, S, Ni, Cu                                      | YES                         | Cd                             |
| PC8         | 9        | 8.9          | NC06        | 6.85        | 3.71          | 18.86        | 15.15            | B73              | Ca, Co, Cd, S                                      | YES                         | Ni                             |
| <b>PC9</b>  | <b>3</b> | <b>148.6</b> | <b>NC06</b> | <b>4.39</b> | <b>3.59</b>   | <b>12.53</b> | <b>8.94</b>      | <b>B73</b>       | <b>Se, Ni, Cu, Zn</b>                              | <b>NO</b>                   |                                |
| <b>PC10</b> | <b>3</b> | <b>156.8</b> | <b>NC06</b> | <b>3.91</b> | <b>3.62</b>   | <b>11.23</b> | <b>7.62</b>      | <b>B73</b>       | <b>Sr, S, Cu, Rb</b>                               | <b>NO</b>                   |                                |
| <b>PC12</b> | <b>1</b> | <b>113.8</b> | <b>NC06</b> | <b>8.30</b> | <b>3.75</b>   | <b>19.02</b> | <b>15.27</b>     | <b>Mo17</b>      | <b>Mn, Rb, Fe, Ni</b>                              | <b>NO</b>                   |                                |
| <b>PC12</b> | <b>1</b> | <b>515.3</b> | <b>NC06</b> | <b>4.74</b> | <b>3.75</b>   | <b>10.27</b> | <b>6.52</b>      | <b>Mo17</b>      | <b>Mn, Rb, Fe, Ni</b>                              | <b>NO</b>                   |                                |
| <b>PC12</b> | <b>9</b> | <b>146.3</b> | <b>NC06</b> | <b>4.32</b> | <b>3.75</b>   | <b>9.31</b>  | <b>5.56</b>      | <b>Mo17</b>      | <b>Mn, Rb, Fe, Ni</b>                              | <b>NO</b>                   |                                |
| PC1         | 5        | 203.8        | NY05        | 6.92        | 3.73          | 14.46        | 10.72            | Mo17             | Mn, Zn, Fe, Mg                                     | YES                         | Mn, Fe, Zn, P, S               |
| PC2         | 2        | 216.9        | NY05        | 5.57        | 3.61          | 8.78         | 5.17             | Mo17             | Cd, Ni, Co, Cd                                     | YES                         | Cd                             |
| PC2         | 3        | 331.0        | NY05        | 5.48        | 3.61          | 8.63         | 5.02             | B73              | Cd, Ni, Co, Cd                                     | YES                         | Sr, Ca                         |
| PC2         | 7        | 193.8        | NY05        | 4.63        | 3.61          | 7.21         | 3.60             | B73              | Cd, Ni, Co, Cd                                     | YES                         | Sr                             |
| PC2         | 9        | 0.9          | NY05        | 6.34        | 3.61          | 10.08        | 6.47             | B73              | Cd, Ni, Co, Cd                                     | YES                         | Ni                             |

|             |           |              |             |              |             |              |              |             |                      |           |        |
|-------------|-----------|--------------|-------------|--------------|-------------|--------------|--------------|-------------|----------------------|-----------|--------|
| PC3         | 1         | 377.3        | NY05        | 14.78        | 3.78        | 19.39        | 15.61        | Mo17        | Mg, Mo, Cu,          | YES       | Mo     |
| PC3         | 2         | 211.0        | NY05        | 12.89        | 3.78        | 16.53        | 12.75        | B73         | Mg, Mo, Cu,          | YES       | Cd     |
| PC3         | 9         | 5.4          | NY05        | 5.66         | 3.78        | 6.67         | 2.89         | Mo17        | Mg, Mo, Cu,          | YES       | Ni     |
| <b>PC3</b>  | <b>10</b> | <b>87.8</b>  | <b>NY05</b> | <b>4.63</b>  | <b>3.78</b> | <b>5.40</b>  | <b>1.62</b>  | <b>Mo17</b> | <b>Mg, Mo, Cu,</b>   | <b>NO</b> |        |
| <b>PC3</b>  | <b>10</b> | <b>121.6</b> | <b>NY05</b> | <b>7.30</b>  | <b>3.78</b> | <b>8.76</b>  | <b>4.99</b>  | <b>B73</b>  | <b>Mg, Mo, Cu,</b>   | <b>NO</b> |        |
| PC4         | 1         | 378.0        | NY05        | 8.49         | 3.55        | 12.49        | 8.94         | Mo17        | Cd, Mn, Mo,          | YES       | Mo     |
| PC4         | 2         | 218.3        | NY05        | 3.98         | 3.55        | 5.56         | 2.01         | Mo17        | Cd, Mn, Mo,          | YES       | Cd     |
| PC4         | 3         | 325.8        | NY05        | 4.18         | 3.55        | 5.84         | 2.29         | B73         | Cd, Mn, Mo,          | YES       | Sr, Ca |
| PC4         | 4         | 178.9        | NY05        | 4.08         | 3.55        | 5.69         | 2.15         | Mo17        | Cd, Mn, Mo,          | YES       | K      |
| PC4         | 7         | 165.9        | NY05        | 7.54         | 3.55        | 10.97        | 7.42         | Mo17        | Cd, Mn, Mo,          | YES       | Cu     |
| PC5         | 1         | 171.4        | NY05        | 5.20         | 3.68        | 6.75         | 3.07         | B73         | Rb, Se, Ni, K,       | YES       | K      |
| PC5         | 2         | 208.9        | NY05        | 7.62         | 3.68        | 10.17        | 6.49         | B73         | Rb, Se, Ni, K,       | YES       | Cd     |
| PC5         | 4         | 374.9        | NY05        | 6.67         | 3.68        | 8.81         | 5.13         | B73         | Rb, Se, Ni, K,       | YES       |        |
| PC5         | 7         | 150.7        | NY05        | 3.96         | 3.68        | 5.06         | 1.39         | Mo17        | Rb, Se, Ni, K,       | YES       | K      |
| PC5         | 9         | 7.7          | NY05        | 8.48         | 3.68        | 11.43        | 7.75         | B73         | Rb, Se, Ni, K,       | YES       | Ni     |
| PC5         | 9         | 136.6        | NY05        | 4.83         | 3.68        | 6.25         | 2.57         | Mo17        | Rb, Se, Ni, K,       | YES       | Ni     |
| PC6         | 1         | 378.0        | NY05        | 14.86        | 3.58        | 23.71        | 20.13        | Mo17        | K, Cd, Rb, Ni        | YES       | Mo     |
| PC6         | 2         | 214.6        | NY05        | 5.77         | 3.58        | 8.28         | 4.70         | Mo17        | K, Cd, Rb, Ni        | YES       | Cd     |
| PC6         | 9         | 8.3          | NY05        | 5.00         | 3.58        | 7.11         | 3.53         | B73         | K, Cd, Rb, Ni        | YES       | Ni     |
| PC9         | 9         | 5.4          | NY05        | 4.09         | 3.72        | 8.82         | 5.10         | B73         | Cd, Zn, Ni, C        | YES       | Ni     |
| PC10        | 1         | 385.7        | NY05        | 4.33         | 3.60        | 8.62         | 5.02         | B73         | Mn, Zn, Mo,          | YES       | Mo     |
| <b>PC10</b> | <b>10</b> | <b>147.6</b> | <b>NY05</b> | <b>4.12</b>  | <b>3.60</b> | <b>8.17</b>  | <b>4.57</b>  | <b>B73</b>  | <b>Mn, Zn, Mo,</b>   | <b>NO</b> |        |
| PC11        | 6         | 128.6        | NY05        | 4.69         | 3.72        | 9.42         | 5.70         | Mo17        | Mg, Mn, K, C         | NO        |        |
| PC11        | 6         | 256.4        | NY05        | 4.73         | 3.72        | 9.50         | 5.78         | Mo17        | Mg, Mn, K, C         | YES       |        |
| PC13        | 1         | 232.0        | NY05        | 4.07         | 3.63        | 8.77         | 5.15         | Mo17        | K, Mo, P, Mg         | YES       | Mn     |
| <b>PC3</b>  | <b>6</b>  | <b>42.5</b>  | <b>NY06</b> | <b>3.64</b>  | <b>3.60</b> | <b>30.57</b> | <b>26.97</b> | <b>Mo17</b> | <b>Cd, Cu, Rb,</b>   | <b>NO</b> |        |
| <b>PC5</b>  | <b>1</b>  | <b>167.0</b> | <b>NY06</b> | <b>3.71</b>  | <b>3.03</b> | <b>1.43</b>  | <b>1.60</b>  | <b>Mo17</b> | <b>Mn, Mg, Co,</b>   | <b>NO</b> |        |
| <b>PC5</b>  | <b>1</b>  | <b>169.7</b> | <b>NY06</b> | <b>14.43</b> | <b>3.03</b> | <b>10.30</b> | <b>7.28</b>  | <b>Mo17</b> | <b>Mn, Mg, Co,</b>   | <b>NO</b> |        |
| <b>PC5</b>  | <b>1</b>  | <b>271.2</b> | <b>NY06</b> | <b>21.58</b> | <b>3.03</b> | <b>24.41</b> | <b>21.38</b> | <b>B73</b>  | <b>Mn, Mg, Co,</b>   | <b>NO</b> |        |
| PC5         | 1         | 379.7        | NY06        | 19.95        | 3.03        | 20.25        | 17.22        | B73         | Mn, Mg, Co,          | YES       | Mo     |
| PC5         | 2         | 98.3         | NY06        | 14.33        | 3.03        | 10.17        | 7.14         | B73         | Mn, Mg, Co,          | YES       | Mo     |
| <b>PC5</b>  | <b>2</b>  | <b>257.5</b> | <b>NY06</b> | <b>10.76</b> | <b>3.03</b> | <b>6.16</b>  | <b>3.13</b>  | <b>B73</b>  | <b>Mn, Mg, Co,</b>   | <b>NO</b> |        |
| <b>PC5</b>  | <b>4</b>  | <b>75.9</b>  | <b>NY06</b> | <b>4.43</b>  | <b>3.03</b> | <b>1.78</b>  | <b>1.25</b>  | <b>B73</b>  | <b>Mn, Mg, Co,</b>   | <b>NO</b> |        |
| <b>PC5</b>  | <b>6</b>  | <b>109.3</b> | <b>NY06</b> | <b>8.99</b>  | <b>3.03</b> | <b>4.64</b>  | <b>1.61</b>  | <b>B73</b>  | <b>Mn, Mg, Co,</b>   | <b>NO</b> |        |
| <b>PC5</b>  | <b>6</b>  | <b>158.0</b> | <b>NY06</b> | <b>16.68</b> | <b>3.03</b> | <b>13.70</b> | <b>10.68</b> | <b>B73</b>  | <b>Mn, Mg, Co,</b>   | <b>NO</b> |        |
| <b>PC5</b>  | <b>8</b>  | <b>355.7</b> | <b>NY06</b> | <b>6.57</b>  | <b>3.03</b> | <b>2.96</b>  | <b>0.07</b>  | <b>B73</b>  | <b>Mn, Mg, Co,</b>   | <b>NO</b> |        |
| <b>PC6</b>  | <b>7</b>  | <b>162.3</b> | <b>NY06</b> | <b>4.33</b>  | <b>3.66</b> | <b>35.20</b> | <b>31.55</b> | <b>Mo17</b> | <b>Mo, Sr, Mn,</b>   | <b>NO</b> |        |
| PC3         | 2         | 214.1        | NY12        | 5.48         | 3.65        | 19.23        | 15.59        | B73         | S, Rb, Ni, K,        | YES       | Cd     |
| PC3         | 9         | 0.0          | NY12        | 3.68         | 3.65        | 12.40        | 8.75         | Mo17        | S, Rb, Ni, K,        | YES       | Ni     |
| <b>PC4</b>  | <b>3</b>  | <b>221.5</b> | <b>NY12</b> | <b>3.72</b>  | <b>3.70</b> | <b>15.21</b> | <b>11.50</b> | <b>B73</b>  | <b>Mn, Se, Co, R</b> | <b>NO</b> |        |
| <b>PC5</b>  | <b>5</b>  | <b>150.9</b> | <b>NY12</b> | <b>3.59</b>  | <b>3.56</b> | <b>14.71</b> | <b>11.14</b> | <b>B73</b>  | <b>Fe, Se, Mo, K</b> | <b>NO</b> |        |
| PC6         | 2         | 210.8        | NY12        | 3.72         | 3.59        | 15.19        | 11.60        | B73         | Mg, Zn, Cd, M        | YES       | Cd     |
| PC7         | 2         | 242.5        | NY12        | 4.62         | 3.58        | 13.90        | 10.31        | B73         | Rb, Cd, S, Mg        | YES       | Ni     |
| <b>PC7</b>  | <b>5</b>  | <b>107.0</b> | <b>NY12</b> | <b>4.72</b>  | <b>3.58</b> | <b>14.24</b> | <b>10.65</b> | <b>B73</b>  | <b>Rb, Cd, S, M</b>  | <b>NO</b> |        |
| <b>PC7</b>  | <b>6</b>  | <b>255.4</b> | <b>NY12</b> | <b>4.07</b>  | <b>3.58</b> | <b>12.11</b> | <b>8.53</b>  | <b>Mo17</b> | <b>Rb, Cd, S, M</b>  | <b>NO</b> |        |
| <b>PC9</b>  | <b>1</b>  | <b>342.2</b> | <b>NY12</b> | <b>5.12</b>  | <b>3.69</b> | <b>20.28</b> | <b>16.59</b> | <b>Mo17</b> | <b>Zn, Mo, Se, F</b> | <b>NO</b> |        |
| <b>PC5</b>  | <b>1</b>  | <b>83.5</b>  | <b>SA10</b> | <b>4.65</b>  | <b>3.68</b> | <b>22.20</b> | <b>18.52</b> | <b>B73</b>  | <b>Co, Cd, Mg,</b>   | <b>NO</b> |        |
| <b>PC5</b>  | <b>4</b>  | <b>382.9</b> | <b>SA10</b> | <b>3.83</b>  | <b>3.68</b> | <b>17.76</b> | <b>14.09</b> | <b>B73</b>  | <b>Co, Cd, Mg,</b>   | <b>NO</b> |        |
| <b>PC9</b>  | <b>1</b>  | <b>418.2</b> | <b>SA10</b> | <b>4.77</b>  | <b>3.28</b> | <b>22.26</b> | <b>18.99</b> | <b>Mo17</b> | <b>Fe, Ni, Co, R</b> | <b>NO</b> |        |
| <b>PC9</b>  | <b>7</b>  | <b>169.8</b> | <b>SA10</b> | <b>4.25</b>  | <b>3.28</b> | <b>19.46</b> | <b>16.19</b> | <b>B73</b>  | <b>Fe, Ni, Co, R</b> | <b>NO</b> |        |
