# Supplementary material for: Multivariate analysis reveals environmental and genetic determinants of element covariation in the maize grain ionome
Source: PubMed Central journal article supplement (PMC6589523; doi:10.1002/pld3.139), 2019-05-10
Supplement: PLD3-3-e00139-s007.pdf [file PLD3-3-e00139-s007.pdf]

**Table S3. PC Variance Proportions and Loadings Across 10 Environments.**

Loadings of elements into each PC within environments.

| FL05                   | PC1   | PC2   | PC3   | PC4   | PC5   | PC6   | PC7   | PC8   | PC9   | PC10  | PC11  | PC12  | PC13  | PC14  | PC15  | PC16  |
|------------------------|-------|-------|-------|-------|-------|-------|-------|-------|-------|-------|-------|-------|-------|-------|-------|-------|
| Standard deviation     | 2.09  | 1.37  | 1.23  | 1.12  | 1.09  | 0.98  | 0.93  | 0.91  | 0.82  | 0.78  | 0.75  | 0.64  | 0.59  | 0.53  | 0.44  | 0.29  |
| Proportion of Variance | 0.27  | 0.12  | 0.09  | 0.08  | 0.07  | 0.06  | 0.05  | 0.05  | 0.04  | 0.04  | 0.04  | 0.03  | 0.02  | 0.02  | 0.01  | 0.01  |
| Cumulative Proportion  | 0.27  | 0.39  | 0.48  | 0.56  | 0.64  | 0.70  | 0.75  | 0.80  | 0.85  | 0.88  | 0.92  | 0.94  | 0.96  | 0.98  | 0.99  | 1.00  |
| Mg                     | 0.33  | -0.03 | 0.20  | -0.30 | 0.09  | -0.24 | 0.07  | 0.13  | -0.42 | 0.11  | 0.08  | 0.41  | -0.15 | -0.18 | 0.50  | -0.11 |
| P                      | 0.38  | -0.13 | -0.04 | -0.20 | 0.11  | 0.00  | 0.12  | 0.26  | -0.27 | 0.20  | -0.02 | 0.13  | 0.18  | 0.21  | -0.69 | 0.14  |
| S                      | 0.33  | 0.01  | 0.12  | 0.02  | 0.36  | -0.15 | 0.05  | -0.10 | 0.15  | 0.24  | 0.40  | -0.57 | -0.37 | 0.04  | 0.02  | 0.08  |
| K                      | 0.24  | 0.01  | -0.56 | -0.04 | -0.05 | -0.20 | 0.32  | -0.13 | -0.01 | -0.05 | -0.14 | -0.17 | 0.28  | 0.47  | 0.34  | -0.03 |
| Ca                     | 0.26  | 0.53  | 0.12  | -0.03 | -0.20 | -0.04 | -0.07 | -0.11 | 0.10  | -0.11 | 0.09  | 0.05  | -0.03 | 0.13  | -0.21 | -0.69 |
| Mn                     | 0.28  | -0.05 | 0.33  | -0.12 | -0.07 | 0.22  | 0.26  | -0.11 | -0.19 | -0.50 | -0.38 | -0.41 | 0.07  | -0.23 | 0.00  | 0.06  |
| Fe                     | 0.32  | -0.18 | 0.29  | 0.17  | 0.02  | 0.08  | -0.01 | 0.00  | 0.43  | 0.20  | 0.13  | 0.09  | 0.66  | -0.16 | 0.16  | -0.03 |
| Co                     | -0.05 | -0.33 | 0.00  | 0.03  | -0.63 | 0.01  | 0.17  | -0.33 | -0.28 | 0.07  | 0.50  | -0.08 | 0.02  | -0.07 | -0.09 | -0.03 |
| Ni                     | 0.17  | -0.17 | -0.09 | 0.28  | -0.17 | -0.54 | -0.44 | 0.39  | -0.05 | -0.39 | 0.07  | -0.15 | 0.05  | -0.08 | -0.04 | 0.02  |
| Cu                     | 0.23  | 0.10  | -0.15 | 0.43  | -0.30 | 0.21  | -0.07 | 0.19  | -0.18 | 0.52  | -0.37 | -0.17 | -0.17 | -0.20 | 0.09  | -0.06 |
| Zn                     | 0.26  | -0.31 | 0.05  | 0.31  | -0.11 | 0.13  | 0.30  | 0.09  | 0.37  | -0.24 | -0.03 | 0.38  | -0.47 | 0.22  | -0.01 | 0.02  |
| Se                     | 0.16  | -0.32 | 0.08  | -0.25 | -0.09 | -0.16 | -0.49 | -0.53 | 0.13  | 0.16  | -0.39 | 0.05  | -0.13 | 0.15  | -0.05 | 0.00  |
| Rb                     | 0.23  | -0.01 | -0.59 | -0.12 | 0.14  | 0.05  | 0.02  | -0.20 | 0.17  | -0.13 | 0.07  | 0.14  | -0.06 | -0.65 | -0.15 | -0.05 |
| Sr                     | 0.23  | 0.56  | 0.06  | 0.00  | -0.28 | -0.07 | -0.07 | -0.16 | 0.08  | -0.05 | 0.08  | 0.17  | -0.01 | 0.02  | 0.02  | 0.69  |
| Mo                     | 0.16  | -0.07 | -0.17 | -0.40 | -0.16 | 0.59  | -0.39 | 0.32  | 0.08  | -0.10 | 0.23  | -0.12 | -0.04 | 0.18  | 0.21  | 0.02  |
| Cd                     | 0.15  | 0.00  | -0.05 | 0.48  | 0.38  | 0.31  | -0.28 | -0.34 | -0.43 | -0.19 | 0.16  | 0.15  | 0.09  | 0.17  | 0.04  | 0.00  |

| FL06                   | PC1  | PC2   | PC3   | PC4   | PC5   | PC6   | PC7   | PC8   | PC9   | PC10  | PC11  | PC12  | PC13  | PC14  | PC15  | PC16  |
|------------------------|------|-------|-------|-------|-------|-------|-------|-------|-------|-------|-------|-------|-------|-------|-------|-------|
| Standard deviation     | 1.80 | 1.47  | 1.34  | 1.20  | 1.14  | 1.02  | 0.95  | 0.91  | 0.77  | 0.77  | 0.72  | 0.69  | 0.63  | 0.57  | 0.52  | 0.40  |
| Proportion of Variance | 0.20 | 0.13  | 0.11  | 0.09  | 0.08  | 0.06  | 0.06  | 0.05  | 0.04  | 0.04  | 0.03  | 0.03  | 0.03  | 0.02  | 0.02  | 0.01  |
| Cumulative Proportion  | 0.20 | 0.34  | 0.45  | 0.54  | 0.62  | 0.68  | 0.74  | 0.79  | 0.83  | 0.87  | 0.90  | 0.93  | 0.95  | 0.97  | 0.99  | 1.00  |
| Mg                     | 0.36 | -0.23 | 0.23  | -0.05 | 0.04  | -0.34 | 0.05  | -0.03 | -0.12 | 0.41  | 0.14  | -0.15 | -0.02 | 0.25  | -0.55 | -0.23 |
| P                      | 0.42 | -0.04 | 0.10  | -0.18 | 0.23  | -0.10 | -0.21 | -0.22 | -0.06 | 0.20  | -0.08 | -0.38 | 0.23  | 0.04  | 0.58  | 0.21  |
| S                      | 0.42 | -0.11 | 0.09  | -0.10 | 0.11  | 0.04  | 0.16  | 0.22  | 0.30  | 0.22  | 0.00  | 0.38  | -0.40 | -0.50 | 0.11  | 0.08  |
| K                      | 0.32 | 0.24  | 0.08  | -0.18 | 0.02  | 0.47  | -0.07 | 0.01  | 0.23  | -0.25 | 0.53  | -0.09 | -0.01 | 0.20  | 0.02  | -0.35 |
| Ca                     | 0.22 | 0.03  | -0.52 | 0.19  | -0.21 | -0.15 | -0.04 | 0.33  | 0.15  | 0.15  | -0.25 | 0.07  | 0.18  | 0.16  | 0.23  | -0.50 |
| Mn                     | 0.35 | 0.06  | 0.12  | 0.09  | -0.27 | -0.16 | 0.40  | -0.11 | -0.41 | -0.42 | 0.01  | 0.03  | 0.29  | -0.37 | 0.02  | -0.13 |
| Fe                     | 0.21 | 0.03  | 0.24  | 0.43  | 0.22  | 0.03  | -0.19 | -0.44 | 0.31  | -0.24 | -0.38 | 0.28  | 0.04  | 0.14  | -0.12 | -0.09 |

|    |       |       |       |       |       |       |       |       |       |       |       |       |       |       |       |       |
|----|-------|-------|-------|-------|-------|-------|-------|-------|-------|-------|-------|-------|-------|-------|-------|-------|
| Co | -0.11 | 0.24  | 0.18  | 0.54  | -0.03 | 0.23  | -0.21 | -0.01 | -0.23 | 0.50  | 0.26  | 0.05  | 0.17  | -0.29 | 0.07  | -0.11 |
| Ni | 0.03  | 0.50  | -0.05 | 0.09  | 0.02  | -0.46 | 0.01  | -0.17 | -0.20 | -0.04 | 0.19  | 0.13  | -0.55 | 0.22  | 0.23  | -0.02 |
| Cu | 0.19  | 0.15  | -0.40 | -0.02 | 0.11  | 0.48  | 0.16  | -0.26 | -0.33 | 0.14  | -0.35 | -0.22 | -0.31 | -0.05 | -0.22 | -0.01 |
| Zn | 0.28  | -0.11 | -0.13 | 0.52  | -0.03 | 0.00  | -0.13 | 0.39  | 0.02  | -0.27 | 0.14  | -0.34 | -0.16 | 0.07  | -0.12 | 0.44  |
| Se | 0.04  | -0.53 | 0.06  | 0.07  | 0.05  | 0.24  | -0.06 | 0.07  | -0.49 | -0.07 | 0.08  | 0.41  | -0.14 | 0.34  | 0.27  | -0.05 |
| Rb | 0.19  | 0.46  | 0.19  | -0.16 | -0.12 | 0.14  | 0.08  | 0.32  | -0.11 | 0.14  | -0.22 | 0.33  | 0.27  | 0.35  | -0.11 | 0.39  |
| Sr | 0.17  | -0.08 | -0.51 | -0.09 | -0.21 | -0.07 | -0.25 | -0.39 | 0.04  | 0.07  | 0.34  | 0.34  | 0.21  | -0.06 | -0.18 | 0.32  |
| Mo | 0.02  | 0.15  | -0.15 | -0.15 | 0.64  | -0.15 | -0.38 | 0.28  | -0.27 | -0.21 | 0.00  | 0.13  | 0.15  | -0.23 | -0.20 | -0.13 |
| Cd | -0.07 | -0.01 | -0.21 | 0.22  | 0.53  | -0.02 | 0.65  | -0.05 | 0.14  | 0.10  | 0.24  | 0.07  | 0.24  | 0.17  | 0.08  | 0.10  |

| IN09                   | PC1   | PC2   | PC3   | PC4   | PC5   | PC6   | PC7   | PC8   | PC9   | PC10  | PC11  | PC12  | PC13  | PC14  | PC15  | PC16  |
|------------------------|-------|-------|-------|-------|-------|-------|-------|-------|-------|-------|-------|-------|-------|-------|-------|-------|
| Standard deviation     | 1.83  | 1.35  | 1.35  | 1.22  | 1.08  | 1.02  | 0.93  | 0.89  | 0.83  | 0.77  | 0.73  | 0.68  | 0.65  | 0.62  | 0.57  | 0.49  |
| Proportion of Variance | 0.21  | 0.11  | 0.11  | 0.09  | 0.07  | 0.07  | 0.05  | 0.05  | 0.04  | 0.04  | 0.03  | 0.03  | 0.03  | 0.02  | 0.02  | 0.01  |
| Cumulative Proportion  | 0.21  | 0.32  | 0.44  | 0.53  | 0.60  | 0.67  | 0.72  | 0.77  | 0.82  | 0.85  | 0.89  | 0.91  | 0.94  | 0.96  | 0.99  | 1.00  |
| Mg                     | -0.27 | 0.27  | -0.21 | 0.25  | -0.04 | 0.02  | -0.49 | 0.00  | -0.16 | 0.10  | 0.50  | 0.17  | 0.29  | 0.10  | 0.31  | 0.07  |
| P                      | -0.28 | 0.09  | -0.34 | 0.19  | -0.09 | 0.37  | -0.07 | 0.18  | -0.01 | 0.20  | -0.32 | -0.57 | -0.12 | -0.30 | 0.09  | -0.05 |
| S                      | -0.34 | 0.04  | -0.08 | 0.19  | 0.17  | -0.08 | 0.32  | -0.08 | -0.48 | -0.57 | 0.04  | -0.03 | 0.13  | -0.22 | -0.20 | 0.16  |
| K                      | -0.34 | 0.05  | 0.11  | 0.02  | 0.36  | 0.30  | 0.35  | 0.19  | -0.13 | 0.20  | 0.16  | 0.13  | -0.32 | 0.44  | 0.07  | -0.29 |
| Ca                     | -0.02 | 0.49  | 0.44  | -0.03 | -0.13 | -0.05 | 0.07  | 0.07  | -0.13 | 0.19  | -0.05 | -0.17 | -0.15 | 0.11  | -0.03 | 0.64  |
| Mn                     | -0.31 | 0.11  | -0.08 | 0.08  | 0.07  | -0.52 | -0.39 | -0.07 | -0.09 | 0.05  | -0.46 | 0.09  | -0.24 | 0.25  | -0.25 | -0.16 |
| Fe                     | -0.36 | -0.01 | -0.08 | -0.16 | -0.24 | -0.20 | 0.22  | -0.10 | 0.46  | -0.11 | 0.24  | -0.42 | 0.26  | 0.36  | -0.15 | -0.03 |
| Co                     | -0.06 | -0.06 | -0.02 | -0.62 | 0.24  | -0.30 | -0.09 | 0.08  | -0.31 | 0.24  | 0.32  | -0.28 | -0.08 | -0.30 | -0.02 | -0.10 |
| Ni                     | -0.16 | -0.34 | 0.20  | 0.05  | -0.13 | -0.06 | -0.18 | 0.83  | 0.08  | -0.15 | 0.06  | 0.08  | 0.03  | -0.04 | -0.14 | 0.11  |
| Cu                     | -0.36 | -0.02 | 0.19  | -0.22 | -0.14 | 0.32  | -0.02 | -0.16 | -0.03 | 0.33  | -0.16 | 0.34  | 0.41  | -0.20 | -0.42 | -0.05 |
| Zn                     | -0.40 | 0.01  | -0.08 | -0.16 | -0.23 | -0.18 | 0.21  | -0.07 | 0.29  | -0.04 | -0.03 | 0.38  | -0.35 | -0.36 | 0.44  | 0.12  |
| Se                     | 0.13  | 0.37  | -0.29 | -0.35 | -0.04 | -0.08 | 0.22  | 0.36  | -0.13 | -0.07 | -0.36 | 0.14  | 0.41  | 0.18  | 0.27  | -0.09 |
| Rb                     | -0.13 | -0.01 | 0.31  | 0.10  | 0.68  | -0.10 | -0.06 | -0.02 | 0.35  | 0.01  | -0.20 | -0.10 | 0.34  | -0.15 | 0.28  | 0.08  |
| Sr                     | 0.03  | 0.43  | 0.48  | 0.12  | -0.23 | -0.06 | -0.03 | 0.05  | 0.03  | -0.20 | 0.08  | -0.10 | -0.01 | -0.25 | 0.03  | -0.62 |
| Mo                     | 0.02  | 0.37  | -0.18 | -0.34 | 0.26  | 0.35  | -0.30 | 0.04  | 0.33  | -0.41 | 0.08  | 0.09  | -0.24 | -0.03 | -0.28 | 0.09  |
| Cd                     | -0.16 | -0.28 | 0.30  | -0.33 | -0.16 | 0.28  | -0.30 | -0.20 | -0.24 | -0.35 | -0.21 | -0.15 | -0.01 | 0.26  | 0.38  | 0.01  |

| IN10                   | PC1   | PC2   | PC3  | PC4   | PC5  | PC6   | PC7  | PC8   | PC9  | PC10  | PC11 | PC12  | PC13  | PC14 | PC15  | PC16 |
|------------------------|-------|-------|------|-------|------|-------|------|-------|------|-------|------|-------|-------|------|-------|------|
| Standard deviation     | 1.81  | 1.46  | 1.38 | 1.22  | 1.15 | 1.00  | 0.92 | 0.84  | 0.82 | 0.80  | 0.70 | 0.64  | 0.58  | 0.55 | 0.49  | 0.45 |
| Proportion of Variance | 0.20  | 0.13  | 0.12 | 0.09  | 0.08 | 0.06  | 0.05 | 0.04  | 0.04 | 0.04  | 0.03 | 0.03  | 0.02  | 0.02 | 0.02  | 0.01 |
| Cumulative Proportion  | 0.20  | 0.34  | 0.46 | 0.55  | 0.63 | 0.70  | 0.75 | 0.79  | 0.84 | 0.88  | 0.91 | 0.93  | 0.95  | 0.97 | 0.99  | 1.00 |
| Mg                     | -0.29 | -0.04 | 0.15 | -0.40 | 0.09 | -0.23 | 0.50 | -0.07 | 0.20 | -0.20 | 0.23 | -0.06 | -0.13 | 0.49 | -0.02 | 0.15 |

|    |       |       |       |       |       |       |       |       |       |       |       |       |       |       |       |       |
|----|-------|-------|-------|-------|-------|-------|-------|-------|-------|-------|-------|-------|-------|-------|-------|-------|
| P  | -0.35 | 0.30  | 0.15  | -0.18 | 0.03  | 0.01  | 0.09  | -0.15 | -0.10 | -0.44 | -0.22 | -0.19 | 0.50  | -0.35 | 0.11  | -0.20 |
| S  | -0.36 | 0.07  | 0.17  | -0.15 | 0.22  | 0.28  | -0.06 | 0.38  | 0.33  | 0.25  | 0.10  | -0.30 | -0.33 | -0.33 | -0.17 | -0.14 |
| K  | -0.27 | 0.18  | 0.31  | 0.22  | 0.23  | 0.22  | -0.43 | -0.07 | -0.09 | 0.19  | 0.13  | -0.13 | 0.29  | 0.48  | 0.13  | 0.22  |
| Ca | -0.10 | -0.40 | 0.42  | 0.18  | -0.25 | -0.03 | 0.07  | 0.02  | -0.02 | -0.08 | -0.29 | -0.12 | 0.04  | -0.17 | -0.36 | 0.53  |
| Mn | -0.27 | -0.32 | 0.04  | -0.06 | 0.31  | -0.37 | 0.01  | -0.18 | -0.06 | 0.39  | 0.27  | 0.37  | 0.24  | -0.35 | 0.07  | 0.04  |
| Fe | -0.37 | -0.01 | -0.24 | -0.17 | -0.30 | -0.24 | -0.21 | 0.11  | -0.11 | 0.12  | -0.29 | -0.13 | -0.27 | -0.02 | 0.56  | 0.26  |
| Co | -0.22 | -0.07 | -0.31 | 0.38  | -0.23 | -0.27 | -0.15 | -0.27 | 0.15  | -0.16 | 0.45  | -0.43 | -0.03 | -0.06 | -0.20 | -0.09 |
| Ni | -0.10 | -0.29 | -0.29 | 0.18  | 0.28  | 0.31  | 0.13  | -0.39 | 0.50  | 0.01  | -0.40 | -0.01 | 0.04  | 0.06  | 0.16  | 0.01  |
| Cu | -0.37 | -0.06 | 0.02  | 0.26  | 0.13  | 0.25  | -0.04 | -0.08 | -0.34 | -0.43 | 0.08  | 0.43  | -0.46 | -0.04 | -0.01 | -0.05 |
| Zn | -0.33 | -0.06 | -0.36 | -0.22 | -0.18 | 0.00  | -0.26 | 0.22  | 0.06  | 0.02  | -0.22 | 0.30  | 0.25  | 0.25  | -0.52 | -0.15 |
| Se | -0.05 | 0.46  | 0.07  | 0.28  | -0.22 | -0.10 | 0.05  | 0.16  | 0.55  | -0.08 | 0.10  | 0.45  | 0.07  | -0.12 | 0.11  | 0.26  |
| Rb | -0.14 | 0.31  | 0.08  | 0.41  | 0.16  | -0.41 | 0.28  | -0.01 | -0.15 | 0.29  | -0.42 | -0.06 | -0.16 | 0.14  | -0.18 | -0.25 |
| Sr | -0.07 | -0.42 | 0.37  | 0.19  | -0.31 | -0.04 | 0.00  | 0.24  | 0.17  | -0.04 | 0.01  | 0.06  | 0.11  | 0.17  | 0.32  | -0.56 |
| Mo | -0.08 | 0.18  | 0.23  | -0.21 | -0.49 | 0.24  | 0.02  | -0.60 | 0.00  | 0.35  | 0.02  | 0.12  | -0.17 | -0.02 | -0.10 | -0.16 |
| Cd | -0.19 | -0.01 | -0.28 | 0.21  | -0.22 | 0.40  | 0.56  | 0.23  | -0.27 | 0.26  | 0.19  | -0.05 | 0.26  | 0.00  | 0.09  | 0.10  |

| NC06                   | PC1   | PC2   | PC3   | PC4   | PC5   | PC6   | PC7   | PC8   | PC9   | PC10  | PC11  | PC12  | PC13  | PC14  | PC15  | PC16  |
|------------------------|-------|-------|-------|-------|-------|-------|-------|-------|-------|-------|-------|-------|-------|-------|-------|-------|
| Standard deviation     | 1.94  | 1.32  | 1.18  | 1.11  | 1.03  | 1.02  | 0.98  | 0.94  | 0.89  | 0.83  | 0.77  | 0.74  | 0.66  | 0.57  | 0.54  | 0.47  |
| Proportion of Variance | 0.24  | 0.11  | 0.09  | 0.08  | 0.07  | 0.06  | 0.06  | 0.06  | 0.05  | 0.04  | 0.04  | 0.03  | 0.03  | 0.02  | 0.02  | 0.01  |
| Cumulative Proportion  | 0.24  | 0.35  | 0.43  | 0.51  | 0.58  | 0.64  | 0.70  | 0.76  | 0.81  | 0.85  | 0.89  | 0.92  | 0.95  | 0.97  | 0.99  | 1.00  |
| Mg                     | -0.34 | 0.19  | -0.06 | 0.12  | -0.51 | 0.14  | -0.04 | 0.08  | -0.11 | 0.05  | -0.06 | 0.19  | 0.06  | -0.23 | -0.60 | -0.26 |
| P                      | -0.37 | 0.15  | -0.09 | 0.30  | -0.22 | -0.03 | 0.12  | 0.09  | -0.29 | 0.25  | 0.00  | 0.17  | -0.15 | -0.12 | 0.45  | 0.51  |
| S                      | -0.32 | -0.04 | -0.22 | -0.12 | 0.14  | -0.27 | -0.22 | -0.19 | -0.13 | 0.31  | 0.11  | -0.65 | -0.22 | -0.03 | -0.23 | 0.06  |
| K                      | -0.38 | 0.15  | -0.22 | -0.10 | 0.28  | -0.15 | 0.03  | 0.17  | -0.17 | 0.10  | -0.02 | 0.19  | 0.10  | 0.22  | 0.32  | -0.63 |
| Ca                     | -0.06 | 0.46  | 0.40  | -0.30 | -0.05 | 0.01  | -0.07 | -0.21 | 0.07  | -0.13 | 0.40  | 0.11  | -0.50 | -0.10 | 0.11  | -0.11 |
| Mn                     | -0.25 | 0.01  | 0.19  | 0.24  | -0.32 | -0.41 | -0.12 | -0.18 | 0.04  | -0.59 | -0.06 | -0.23 | 0.22  | 0.21  | 0.16  | -0.04 |
| Fe                     | -0.31 | -0.19 | 0.07  | 0.09  | -0.03 | 0.41  | 0.21  | -0.15 | 0.43  | 0.06  | 0.10  | -0.29 | 0.17  | -0.41 | 0.29  | -0.20 |
| Co                     | -0.17 | -0.25 | 0.10  | -0.55 | -0.23 | -0.12 | -0.03 | 0.29  | 0.18  | -0.03 | -0.56 | 0.01  | -0.28 | -0.10 | 0.12  | 0.05  |
| Ni                     | -0.12 | -0.27 | 0.37  | -0.09 | -0.02 | 0.29  | -0.24 | 0.55  | -0.34 | -0.08 | 0.36  | -0.20 | 0.12  | 0.12  | 0.01  | 0.03  |
| Cu                     | -0.23 | -0.02 | 0.24  | 0.13  | 0.43  | 0.26  | 0.36  | -0.16 | -0.36 | -0.31 | -0.38 | -0.07 | -0.24 | -0.01 | -0.20 | 0.03  |
| Zn                     | -0.34 | -0.20 | 0.25  | 0.05  | 0.04  | -0.03 | 0.21  | -0.06 | 0.41  | 0.27  | 0.13  | 0.21  | -0.05 | 0.59  | -0.23 | 0.16  |
| Se                     | -0.10 | -0.19 | -0.23 | -0.55 | -0.19 | 0.19  | 0.16  | -0.47 | -0.32 | -0.11 | 0.17  | 0.13  | 0.28  | 0.13  | 0.04  | 0.15  |
| Rb                     | -0.32 | 0.08  | -0.15 | -0.15 | 0.43  | -0.17 | -0.15 | 0.18  | 0.23  | -0.32 | 0.17  | 0.26  | 0.24  | -0.34 | -0.19 | 0.34  |
| Sr                     | -0.03 | 0.50  | 0.37  | -0.17 | 0.09  | 0.11  | -0.20 | -0.10 | 0.00  | 0.31  | -0.35 | -0.14 | 0.50  | 0.07  | 0.03  | 0.15  |
| Mo                     | -0.06 | 0.36  | -0.46 | -0.01 | -0.06 | 0.48  | -0.10 | 0.17  | 0.23  | -0.28 | -0.07 | -0.22 | -0.16 | 0.39  | 0.03  | 0.13  |
| Cd                     | -0.11 | -0.28 | 0.00  | 0.18  | 0.10  | 0.25  | -0.74 | -0.34 | 0.00  | 0.03  | -0.17 | 0.30  | -0.15 | 0.02  | 0.09  | -0.05 |

| NY05 | PC1 | PC2 | PC3 | PC4 | PC5 | PC6 | PC7 | PC8 | PC9 | PC10 | PC11 | PC12 | PC13 | PC14 | PC15 | PC16 |
|------|-----|-----|-----|-----|-----|-----|-----|-----|-----|------|------|------|------|------|------|------|
|------|-----|-----|-----|-----|-----|-----|-----|-----|-----|------|------|------|------|------|------|------|

|                        |      |       |       |       |       |       |       |       |       |       |       |       |       |       |       |       |
|------------------------|------|-------|-------|-------|-------|-------|-------|-------|-------|-------|-------|-------|-------|-------|-------|-------|
| Standard deviation     | 1.99 | 1.44  | 1.23  | 1.16  | 1.04  | 1.00  | 0.92  | 0.88  | 0.83  | 0.81  | 0.75  | 0.67  | 0.63  | 0.56  | 0.49  | 0.32  |
| Proportion of Variance | 0.25 | 0.13  | 0.09  | 0.08  | 0.07  | 0.06  | 0.05  | 0.05  | 0.04  | 0.04  | 0.04  | 0.03  | 0.02  | 0.02  | 0.02  | 0.01  |
| Cumulative Proportion  | 0.25 | 0.38  | 0.47  | 0.56  | 0.62  | 0.69  | 0.74  | 0.79  | 0.83  | 0.87  | 0.91  | 0.93  | 0.96  | 0.98  | 0.99  | 1.00  |
| Mg                     | 0.36 | -0.05 | 0.29  | -0.15 | 0.14  | 0.14  | -0.21 | 0.18  | -0.02 | 0.07  | 0.27  | -0.26 | -0.41 | -0.09 | -0.56 | 0.10  |
| P                      | 0.39 | 0.05  | 0.29  | 0.12  | 0.11  | -0.05 | -0.22 | 0.09  | 0.00  | 0.18  | 0.05  | -0.03 | -0.28 | 0.24  | 0.71  | 0.01  |
| S                      | 0.34 | 0.10  | 0.10  | -0.08 | -0.24 | 0.03  | 0.08  | -0.33 | -0.18 | 0.25  | -0.55 | 0.46  | -0.21 | 0.00  | -0.20 | -0.03 |
| K                      | 0.19 | -0.02 | -0.01 | 0.51  | 0.42  | -0.31 | -0.10 | -0.21 | 0.06  | 0.15  | -0.34 | -0.37 | 0.25  | -0.05 | -0.18 | -0.02 |
| Ca                     | 0.12 | -0.59 | -0.27 | -0.14 | 0.03  | 0.04  | -0.05 | -0.04 | -0.05 | 0.00  | -0.14 | -0.03 | 0.01  | -0.13 | 0.14  | 0.69  |
| Mn                     | 0.35 | -0.10 | 0.08  | -0.32 | 0.09  | -0.06 | -0.11 | 0.03  | -0.17 | 0.26  | 0.28  | 0.21  | 0.70  | 0.09  | -0.05 | -0.11 |
| Fe                     | 0.36 | 0.10  | -0.10 | -0.11 | -0.23 | 0.04  | 0.17  | -0.18 | -0.01 | -0.51 | -0.07 | -0.34 | 0.11  | 0.57  | -0.06 | 0.06  |
| Co                     | 0.17 | 0.31  | -0.27 | -0.09 | 0.21  | -0.06 | 0.15  | 0.55  | -0.53 | -0.17 | -0.24 | -0.06 | -0.01 | -0.21 | 0.07  | 0.00  |
| Ni                     | 0.05 | 0.21  | -0.40 | -0.14 | 0.39  | 0.46  | -0.24 | 0.12  | 0.47  | 0.07  | -0.20 | 0.17  | 0.01  | 0.22  | -0.05 | -0.01 |
| Cu                     | 0.21 | -0.05 | -0.38 | 0.47  | 0.06  | -0.22 | -0.07 | -0.02 | -0.09 | -0.21 | 0.41  | 0.50  | -0.18 | 0.13  | -0.15 | 0.03  |
| Zn                     | 0.36 | 0.17  | -0.15 | -0.18 | -0.02 | -0.05 | -0.05 | -0.34 | 0.27  | -0.30 | 0.13  | -0.05 | 0.00  | -0.65 | 0.20  | -0.15 |
| Se                     | 0.25 | -0.02 | -0.03 | 0.10  | -0.37 | -0.28 | 0.31  | 0.51  | 0.55  | 0.18  | -0.07 | 0.02  | 0.08  | -0.05 | -0.06 | 0.07  |
| Rb                     | 0.15 | -0.12 | 0.10  | 0.19  | 0.29  | 0.46  | 0.75  | -0.10 | -0.01 | 0.09  | 0.17  | 0.02  | 0.00  | -0.07 | 0.07  | -0.04 |
| Sr                     | 0.08 | -0.62 | -0.24 | -0.09 | -0.03 | 0.01  | -0.04 | 0.10  | -0.05 | -0.01 | -0.14 | -0.11 | -0.17 | 0.04  | 0.02  | -0.68 |
| Mo                     | 0.09 | -0.14 | 0.31  | 0.42  | -0.24 | 0.48  | -0.30 | 0.23  | -0.03 | -0.35 | -0.17 | 0.13  | 0.28  | -0.18 | -0.01 | -0.03 |
| Cd                     | 0.07 | 0.18  | -0.43 | 0.23  | -0.44 | 0.31  | -0.11 | -0.09 | -0.20 | 0.47  | 0.19  | -0.34 | 0.02  | -0.06 | 0.03  | 0.00  |

|                        |       |       |       |       |       |       |       |       |       |       |       |       |       |       |       |       |
|------------------------|-------|-------|-------|-------|-------|-------|-------|-------|-------|-------|-------|-------|-------|-------|-------|-------|
| NY06                   | PC1   | PC2   | PC3   | PC4   | PC5   | PC6   | PC7   | PC8   | PC9   | PC10  | PC11  | PC12  | PC13  | PC14  | PC15  | PC16  |
| Standard deviation     | 2.05  | 1.57  | 1.22  | 1.15  | 1.14  | 0.96  | 0.94  | 0.83  | 0.78  | 0.68  | 0.68  | 0.62  | 0.56  | 0.50  | 0.44  | 0.27  |
| Proportion of Variance | 0.26  | 0.15  | 0.09  | 0.08  | 0.08  | 0.06  | 0.05  | 0.04  | 0.04  | 0.03  | 0.03  | 0.02  | 0.02  | 0.02  | 0.01  | 0.00  |
| Cumulative Proportion  | 0.26  | 0.42  | 0.51  | 0.59  | 0.67  | 0.73  | 0.79  | 0.83  | 0.87  | 0.90  | 0.92  | 0.95  | 0.97  | 0.98  | 1.00  | 1.00  |
| Mg                     | -0.37 | 0.16  | -0.08 | 0.06  | -0.33 | 0.11  | -0.24 | 0.08  | -0.03 | 0.12  | 0.11  | -0.37 | 0.00  | 0.51  | 0.25  | -0.39 |
| P                      | -0.40 | 0.05  | -0.03 | 0.24  | -0.17 | -0.14 | 0.28  | -0.14 | -0.12 | 0.03  | -0.08 | -0.16 | -0.34 | -0.14 | 0.38  | 0.55  |
| S                      | -0.42 | 0.13  | -0.17 | -0.02 | 0.05  | -0.04 | 0.00  | -0.18 | -0.05 | -0.05 | -0.07 | -0.16 | -0.37 | -0.34 | -0.60 | -0.31 |
| K                      | -0.30 | -0.13 | 0.13  | 0.23  | 0.01  | -0.45 | 0.19  | 0.29  | 0.31  | -0.07 | -0.51 | 0.16  | 0.24  | 0.07  | 0.00  | -0.22 |
| Ca                     | -0.11 | -0.16 | -0.27 | -0.64 | 0.09  | 0.17  | -0.07 | -0.15 | 0.23  | 0.01  | -0.47 | -0.24 | 0.11  | 0.10  | 0.05  | 0.23  |
| Mn                     | -0.29 | 0.06  | -0.11 | -0.24 | -0.26 | 0.27  | 0.42  | 0.28  | 0.08  | -0.39 | 0.35  | 0.08  | 0.34  | -0.21 | 0.00  | 0.00  |
| Fe                     | -0.34 | -0.08 | 0.15  | 0.06  | 0.23  | 0.13  | -0.41 | -0.38 | 0.24  | -0.09 | 0.13  | 0.24  | 0.15  | -0.36 | 0.40  | -0.17 |
| Co                     | 0.03  | -0.05 | 0.58  | -0.29 | -0.35 | -0.17 | -0.13 | -0.17 | 0.10  | -0.48 | 0.01  | 0.05  | -0.28 | 0.18  | -0.10 | 0.05  |
| Ni                     | -0.18 | 0.27  | 0.36  | -0.36 | -0.09 | 0.04  | -0.14 | 0.43  | -0.04 | 0.55  | -0.04 | 0.23  | -0.12 | -0.22 | 0.01  | 0.07  |
| Cu                     | -0.20 | -0.28 | 0.30  | -0.10 | 0.06  | 0.16  | 0.46  | -0.42 | -0.35 | 0.31  | -0.02 | 0.16  | 0.16  | 0.23  | -0.07 | -0.17 |
| Zn                     | -0.31 | -0.32 | 0.07  | 0.21  | 0.15  | 0.14  | -0.21 | 0.13  | 0.27  | 0.11  | 0.30  | 0.02  | 0.06  | 0.30  | -0.42 | 0.44  |
| Se                     | -0.04 | -0.33 | -0.14 | 0.11  | -0.51 | 0.03  | -0.39 | 0.03  | -0.48 | -0.04 | -0.23 | 0.15  | 0.26  | -0.21 | -0.13 | 0.10  |

|    |       |       |       |       |       |       |       |       |       |       |       |      |       |       |       |       |
|----|-------|-------|-------|-------|-------|-------|-------|-------|-------|-------|-------|------|-------|-------|-------|-------|
| Rb | -0.15 | 0.44  | -0.34 | -0.06 | 0.05  | -0.07 | -0.07 | -0.15 | -0.12 | -0.13 | -0.06 | 0.65 | -0.04 | 0.38  | -0.04 | 0.13  |
| Sr | 0.01  | -0.52 | -0.20 | -0.04 | 0.04  | 0.24  | 0.06  | 0.30  | 0.01  | -0.07 | -0.03 | 0.30 | -0.59 | 0.06  | 0.20  | -0.22 |
| Mo | 0.21  | 0.05  | -0.11 | 0.17  | -0.54 | 0.22  | 0.14  | -0.30 | 0.56  | 0.31  | -0.07 | 0.18 | -0.05 | -0.06 | -0.10 | -0.03 |
| Cd | -0.01 | -0.27 | -0.28 | -0.31 | -0.13 | -0.68 | -0.01 | -0.11 | 0.06  | 0.23  | 0.44  | 0.05 | 0.02  | -0.03 | 0.05  | -0.05 |

|                        |       |       |       |       |       |       |       |       |       |       |       |       |       |       |       |       |
|------------------------|-------|-------|-------|-------|-------|-------|-------|-------|-------|-------|-------|-------|-------|-------|-------|-------|
| NY12                   | PC1   | PC2   | PC3   | PC4   | PC5   | PC6   | PC7   | PC8   | PC9   | PC10  | PC11  | PC12  | PC13  | PC14  | PC15  | PC16  |
| Standard deviation     | 1.89  | 1.42  | 1.28  | 1.18  | 1.05  | 0.98  | 0.96  | 0.94  | 0.87  | 0.81  | 0.78  | 0.67  | 0.61  | 0.53  | 0.53  | 0.31  |
| Proportion of Variance | 0.22  | 0.13  | 0.10  | 0.09  | 0.07  | 0.06  | 0.06  | 0.06  | 0.05  | 0.04  | 0.04  | 0.03  | 0.02  | 0.02  | 0.02  | 0.01  |
| Cumulative Proportion  | 0.22  | 0.35  | 0.45  | 0.54  | 0.61  | 0.67  | 0.73  | 0.78  | 0.83  | 0.87  | 0.91  | 0.94  | 0.96  | 0.98  | 0.99  | 1.00  |
| Mg                     | 0.34  | -0.16 | 0.03  | -0.21 | 0.17  | -0.29 | 0.42  | -0.16 | 0.12  | 0.16  | -0.19 | 0.30  | -0.02 | -0.47 | 0.34  | 0.01  |
| P                      | 0.39  | 0.02  | 0.19  | 0.15  | 0.06  | 0.05  | 0.17  | -0.33 | 0.21  | -0.08 | -0.16 | 0.37  | 0.03  | 0.53  | -0.38 | 0.03  |
| S                      | 0.31  | -0.09 | -0.25 | -0.20 | 0.01  | 0.22  | -0.34 | 0.07  | -0.10 | -0.44 | -0.41 | 0.03  | -0.50 | -0.08 | 0.02  | 0.02  |
| K                      | 0.14  | 0.05  | 0.44  | 0.35  | 0.39  | 0.16  | -0.20 | 0.07  | -0.19 | -0.37 | -0.02 | 0.05  | 0.36  | -0.10 | 0.36  | 0.00  |
| Ca                     | 0.16  | 0.60  | 0.05  | -0.24 | 0.07  | -0.05 | -0.08 | 0.05  | -0.11 | 0.16  | 0.03  | -0.02 | -0.03 | 0.05  | 0.05  | 0.70  |
| Mn                     | 0.37  | -0.07 | 0.10  | -0.26 | 0.10  | -0.05 | 0.24  | -0.11 | 0.04  | -0.13 | 0.04  | -0.80 | 0.10  | 0.16  | 0.01  | -0.09 |
| Fe                     | 0.37  | -0.16 | -0.17 | -0.04 | -0.31 | 0.02  | -0.06 | 0.24  | -0.18 | 0.15  | 0.31  | 0.18  | 0.04  | 0.44  | 0.51  | -0.08 |
| Co                     | -0.01 | 0.23  | -0.16 | 0.32  | -0.07 | 0.18  | 0.60  | 0.56  | 0.00  | -0.08 | -0.32 | -0.06 | -0.02 | 0.05  | 0.01  | 0.00  |
| Ni                     | -0.02 | 0.07  | -0.41 | 0.03  | 0.59  | 0.08  | 0.01  | 0.08  | 0.49  | -0.12 | 0.41  | 0.05  | -0.12 | 0.08  | 0.09  | 0.00  |
| Cu                     | 0.24  | 0.02  | 0.15  | 0.54  | 0.15  | -0.26 | -0.11 | 0.02  | -0.14 | 0.35  | 0.11  | -0.18 | -0.56 | -0.06 | -0.06 | -0.08 |
| Zn                     | 0.36  | -0.19 | -0.16 | -0.05 | 0.12  | 0.30  | 0.06  | 0.18  | -0.36 | 0.12  | 0.32  | 0.10  | 0.22  | -0.32 | -0.51 | 0.06  |
| Se                     | 0.19  | 0.14  | -0.08 | 0.28  | -0.37 | 0.54  | -0.08 | -0.32 | 0.39  | 0.17  | 0.02  | -0.15 | 0.07  | -0.29 | 0.16  | 0.05  |
| Rb                     | 0.04  | -0.23 | 0.37  | -0.23 | 0.15  | 0.20  | -0.25 | 0.47  | 0.39  | 0.44  | -0.25 | -0.02 | 0.02  | 0.07  | -0.05 | -0.02 |
| Sr                     | 0.11  | 0.63  | 0.02  | -0.24 | 0.07  | 0.05  | -0.09 | 0.00  | -0.09 | 0.13  | -0.02 | 0.11  | 0.03  | -0.05 | -0.03 | -0.69 |
| Mo                     | 0.25  | 0.11  | 0.14  | 0.05  | -0.38 | -0.43 | -0.16 | 0.33  | 0.39  | -0.37 | 0.22  | 0.05  | 0.08  | -0.23 | -0.19 | -0.01 |
| Cd                     | 0.14  | -0.01 | -0.51 | 0.23  | 0.11  | -0.34 | -0.31 | -0.01 | 0.02  | 0.19  | -0.41 | -0.12 | 0.47  | 0.04  | -0.04 | 0.01  |

|                        |       |       |       |      |       |       |       |       |       |       |       |       |       |       |       |       |
|------------------------|-------|-------|-------|------|-------|-------|-------|-------|-------|-------|-------|-------|-------|-------|-------|-------|
| MO06                   | PC1   | PC2   | PC3   | PC4  | PC5   | PC6   | PC7   | PC8   | PC9   | PC10  | PC11  | PC12  | PC13  | PC14  | PC15  | PC16  |
| Standard deviation     | 2.01  | 1.48  | 1.30  | 1.20 | 1.11  | 1.04  | 0.89  | 0.78  | 0.77  | 0.74  | 0.70  | 0.67  | 0.58  | 0.49  | 0.37  | 0.33  |
| Proportion of Variance | 0.25  | 0.14  | 0.10  | 0.09 | 0.08  | 0.07  | 0.05  | 0.04  | 0.04  | 0.03  | 0.03  | 0.03  | 0.02  | 0.02  | 0.01  | 0.01  |
| Cumulative Proportion  | 0.25  | 0.39  | 0.50  | 0.59 | 0.66  | 0.73  | 0.78  | 0.82  | 0.86  | 0.89  | 0.92  | 0.95  | 0.97  | 0.98  | 0.99  | 1.00  |
| Mg                     | -0.26 | 0.12  | -0.02 | 0.05 | -0.25 | 0.54  | -0.28 | 0.08  | -0.16 | 0.09  | -0.60 | 0.12  | -0.24 | -0.01 | 0.00  | -0.08 |
| P                      | -0.41 | 0.06  | -0.09 | 0.04 | 0.01  | 0.24  | 0.33  | 0.05  | 0.01  | -0.15 | 0.03  | 0.05  | 0.37  | 0.35  | -0.43 | 0.42  |
| S                      | -0.30 | 0.26  | -0.05 | 0.16 | 0.25  | -0.29 | 0.16  | -0.13 | -0.15 | -0.48 | -0.08 | -0.01 | -0.53 | 0.22  | 0.21  | 0.03  |
| K                      | -0.38 | 0.03  | 0.15  | 0.12 | -0.05 | 0.11  | 0.52  | -0.09 | 0.15  | -0.04 | -0.05 | -0.03 | 0.25  | -0.47 | 0.28  | -0.37 |
| Ca                     | -0.16 | -0.51 | 0.15  | 0.07 | 0.34  | 0.06  | 0.00  | 0.08  | -0.20 | 0.01  | 0.12  | 0.21  | -0.18 | 0.08  | -0.42 | -0.48 |
| Mn                     | -0.22 | 0.10  | -0.24 | 0.45 | 0.04  | 0.29  | -0.29 | -0.01 | -0.24 | 0.16  | 0.56  | -0.20 | 0.06  | 0.04  | 0.25  | -0.05 |

|    |       |       |       |       |       |       |       |       |       |       |       |       |       |       |       |       |
|----|-------|-------|-------|-------|-------|-------|-------|-------|-------|-------|-------|-------|-------|-------|-------|-------|
| Fe | -0.33 | 0.11  | 0.13  | -0.22 | -0.02 | -0.35 | 0.04  | -0.04 | -0.18 | 0.61  | -0.03 | 0.26  | 0.11  | 0.37  | 0.25  | -0.07 |
| Co | -0.11 | -0.27 | -0.44 | 0.13  | -0.12 | -0.31 | 0.22  | 0.49  | -0.20 | 0.23  | -0.18 | -0.29 | -0.15 | -0.22 | -0.06 | 0.15  |
| Ni | -0.08 | -0.29 | -0.52 | -0.25 | 0.17  | -0.04 | -0.23 | -0.13 | 0.00  | -0.29 | -0.24 | -0.06 | 0.42  | 0.18  | 0.26  | -0.23 |
| Cu | -0.22 | -0.07 | -0.01 | -0.52 | -0.25 | 0.17  | 0.00  | 0.45  | 0.28  | -0.18 | 0.38  | 0.02  | -0.26 | 0.11  | 0.18  | -0.08 |
| Zn | -0.24 | 0.28  | -0.35 | -0.32 | 0.14  | -0.11 | -0.20 | -0.19 | -0.04 | 0.05  | 0.16  | 0.32  | -0.07 | -0.54 | -0.30 | 0.09  |
| Se | -0.21 | 0.17  | 0.18  | 0.35  | -0.01 | -0.36 | -0.43 | 0.45  | 0.32  | -0.18 | -0.08 | 0.17  | 0.26  | -0.04 | -0.09 | -0.10 |
| Rb | -0.30 | -0.22 | -0.06 | 0.10  | -0.26 | -0.15 | -0.15 | -0.47 | 0.52  | 0.17  | -0.01 | -0.33 | -0.22 | 0.10  | -0.21 | -0.03 |
| Sr | -0.19 | -0.52 | 0.24  | 0.06  | 0.17  | 0.05  | -0.16 | -0.07 | 0.04  | -0.03 | -0.02 | 0.24  | -0.04 | -0.22 | 0.35  | 0.58  |
| Mo | -0.22 | 0.02  | 0.43  | -0.31 | -0.06 | -0.12 | -0.23 | -0.03 | -0.44 | -0.16 | 0.00  | -0.56 | 0.15  | -0.15 | -0.13 | 0.04  |
| Cd | -0.04 | 0.19  | 0.04  | -0.14 | 0.72  | 0.20  | -0.02 | 0.19  | 0.33  | 0.29  | -0.15 | -0.35 | -0.06 | 0.00  | 0.03  | 0.05  |

|                        |       |       |       |       |       |       |       |       |       |       |       |       |       |       |       |       |
|------------------------|-------|-------|-------|-------|-------|-------|-------|-------|-------|-------|-------|-------|-------|-------|-------|-------|
| SA10                   | PC1   | PC2   | PC3   | PC4   | PC5   | PC6   | PC7   | PC8   | PC9   | PC10  | PC11  | PC12  | PC13  | PC14  | PC15  | PC16  |
| Standard deviation     | 2.37  | 1.57  | 1.19  | 1.07  | 1.01  | 0.93  | 0.83  | 0.75  | 0.71  | 0.69  | 0.60  | 0.54  | 0.46  | 0.42  | 0.35  | 0.28  |
| Proportion of Variance | 0.35  | 0.15  | 0.09  | 0.07  | 0.06  | 0.05  | 0.04  | 0.04  | 0.03  | 0.03  | 0.02  | 0.02  | 0.01  | 0.01  | 0.01  | 0.00  |
| Cumulative Proportion  | 0.35  | 0.51  | 0.59  | 0.67  | 0.73  | 0.78  | 0.83  | 0.86  | 0.89  | 0.92  | 0.95  | 0.96  | 0.98  | 0.99  | 1.00  | 1.00  |
| Mg                     | 0.31  | -0.12 | 0.24  | -0.17 | 0.39  | -0.07 | 0.12  | -0.32 | 0.20  | -0.09 | 0.16  | -0.16 | 0.14  | -0.38 | -0.34 | -0.39 |
| P                      | 0.32  | -0.21 | 0.31  | 0.12  | 0.07  | 0.11  | -0.18 | -0.27 | 0.08  | 0.11  | 0.03  | 0.05  | 0.17  | 0.00  | 0.75  | 0.10  |
| S                      | 0.29  | -0.19 | 0.15  | -0.12 | 0.09  | -0.15 | -0.27 | 0.58  | 0.09  | -0.31 | -0.22 | 0.43  | 0.01  | -0.23 | -0.06 | 0.11  |
| K                      | 0.24  | -0.12 | 0.36  | 0.15  | -0.49 | 0.09  | 0.11  | -0.03 | -0.05 | -0.31 | -0.32 | -0.50 | -0.04 | 0.02  | -0.18 | 0.18  |
| Ca                     | 0.13  | 0.49  | 0.23  | -0.06 | 0.12  | -0.16 | 0.29  | -0.04 | -0.19 | -0.11 | -0.27 | 0.13  | -0.54 | -0.01 | 0.26  | -0.26 |
| Mn                     | 0.36  | 0.15  | 0.07  | -0.09 | 0.18  | 0.18  | 0.06  | -0.23 | 0.13  | 0.29  | -0.02 | 0.23  | -0.20 | 0.20  | -0.34 | 0.60  |
| Fe                     | 0.30  | 0.09  | -0.08 | -0.34 | -0.01 | -0.31 | -0.01 | 0.25  | -0.22 | -0.07 | 0.58  | -0.38 | -0.10 | 0.07  | 0.15  | 0.21  |
| Co                     | 0.26  | 0.20  | -0.37 | -0.12 | -0.20 | -0.02 | -0.22 | 0.10  | 0.27  | 0.47  | -0.32 | -0.27 | -0.07 | -0.38 | 0.09  | -0.09 |
| Ni                     | 0.16  | 0.28  | -0.23 | 0.36  | 0.17  | 0.06  | -0.65 | -0.25 | -0.26 | -0.34 | 0.03  | -0.07 | -0.07 | -0.01 | -0.12 | -0.03 |
| Cu                     | 0.29  | -0.13 | -0.08 | 0.10  | -0.13 | 0.33  | 0.20  | 0.09  | -0.70 | 0.25  | 0.07  | 0.21  | 0.12  | -0.26 | -0.09 | -0.14 |
| Zn                     | 0.36  | -0.19 | -0.12 | -0.04 | 0.10  | 0.02  | -0.06 | 0.15  | 0.03  | 0.12  | -0.17 | -0.07 | 0.03  | 0.73  | -0.08 | -0.45 |
| Se                     | -0.11 | 0.29  | 0.33  | 0.03  | 0.17  | 0.66  | -0.10 | 0.43  | 0.16  | 0.05  | 0.21  | -0.22 | -0.04 | 0.00  | 0.01  | -0.10 |
| Rb                     | 0.25  | 0.19  | -0.04 | 0.21  | -0.56 | 0.02  | 0.06  | -0.06 | 0.37  | -0.11 | 0.44  | 0.37  | -0.05 | 0.02  | -0.05 | -0.23 |
| Sr                     | 0.08  | 0.56  | 0.07  | -0.10 | -0.01 | -0.12 | 0.12  | 0.03  | -0.06 | -0.06 | -0.16 | 0.05  | 0.76  | 0.11  | 0.00  | 0.06  |
| Mo                     | -0.17 | 0.05  | 0.55  | 0.00  | -0.20 | -0.35 | -0.42 | -0.01 | -0.18 | 0.46  | 0.08  | 0.06  | -0.02 | 0.06  | -0.21 | -0.13 |
| Cd                     | 0.10  | 0.01  | 0.00  | 0.76  | 0.27  | -0.33 | 0.25  | 0.27  | 0.10  | 0.20  | 0.07  | -0.14 | 0.03  | -0.05 | -0.03 | 0.10  |
