# Supplementary material for: Multivariate analysis reveals environmental and genetic determinants of element covariation in the maize grain ionome
Source: PubMed Central journal article supplement (PMC6589523; doi:10.1002/pld3.139), 2019-05-10
Supplement: PLD3-3-e00139-s008.pdf [file PLD3-3-e00139-s008.pdf]

| <b>Location</b> | <b>Weather Station</b>             |
|-----------------|------------------------------------|
| Florida         | Homestead General Aviation Airport |
| Indiana         | West Lafayette 6 NW                |
| North Carolina  | Clayton Field                      |
| New York        | Aurora Research Farm               |
| Missouri        | Columbia U of M                    |

**Table S4. Weather Station Locations.** Location and name of weather station from which weather data was obtained.
